# Supplementary material
Source: publisher site journal article supplement (https://www.dovepress.com/article/348152)
Supplement: Supplementary file 1 [file get_supplementary_file.php]

Appendix 1 – Search Strategies

## Database: Ovid MEDLINE: Epub Ahead of Print, In-Process & Other Non-Indexed Citations, Ovid MEDLINE® Daily and Ovid MEDLINE® <2004-July 26, 2019>

## Search Strategy:

--------------------------------------------------------------------------------

1 Transitional Care/

2 Continuity of Patient Care/

3 aftercare/

4 patient discharge/

5 patient transfer/

6 Patient Handoff/

7 transition to adult care/

8 retention in care/

9 (transition* adj3 care*).tw,kf.

10 (pre-transition* or post-transition*).tw,kf.

11 (transition* adj2 (patient* or team*)).tw,kf

12 (patient* adj2 (discharg* or transfer*)).tw,kf.

13 (caregiver* adj2 (discharg* or transfer*)).tw,kf.

14 (after adj2 (discharg* or transfer*)).tw,kf.

15 (follow* adj2 (discharg* or transfer*)).tw,kf.

16 (discharg* adj2 plan*).tw,kf.

17 (hospital* adj5 discharg*).tw,kf.

18 (hospital* adj2 leav*).tw,kf.

19 inhospital*.tw,kf.

20 1 or 2 or 3 or 4 or 5 or 6 or 7 or 8 or 9 or 10 or 11 or 12 or 13 or 14 or 15 or 16 or 17 or 18 or 19

21 health education/

22 health literacy/

23 Patient Education as Topic/

24 Comprehension/

25 Teaching/

26 communication/

27 Health Knowledge, Attitudes, Practice/

28 Patient Participation/

29 21 or 22 or 23 or 24 or 25 or 26 or 27 or 28

30 Pharmaceutical Preparations

31 Drug Prescriptions/

32 Drug Therapy/

33 Pharmacy Service, Hospital/

34 Medication Adherence/

35 drug information services/

36 prescription drug monitoring programs/

37 medication therapy management/

38 30 or 31 or 32 or 33 or 34 or 35 or 36 or 37

39 29 and 38

40 (medication* adj2 (understand* or adher* or comprehen* or inform* or knowledg* or complian*)).tw,kf

41 (prescri* adj2 (understand* or adher* or comprehen* or inform* or knowledg* or complian*)).tw,kf.

42 (pharmaceutic* adj2 (understand* or adher* or comprehen* or inform* or knowledg* or complian*)).tw,kf.

43 (dose* adj2 (understand* or adher* or comprehen* or inform* or knowledg* or complian*)).tw,kf

44 (dosing* adj2 (understand* or adher* or comprehen* or inform* or knowledg* or complian*)).tw,kf.

45 (drug* adj2 (understand* or adher* or comprehen* or inform* or knowledg* or complian*)).tw,kf.

46 (medication* adj3 (support* or educat* or tool* or intervention* or counsel* or pamphlet* or brochure* or information* or interview* or program* or discuss* or teach* or instruct*)).tw,kf.

47 (prescri* adj3 (support* or educat* or tool* or intervention* or counsel* or pamphlet* or brochure* or information or interview* or program* or discuss* or teach* or instruct*)).tw,kf.

48 (pharmaceutic* adj3 (support* or educat* or tool* or intervention* or counsel* or pamphlet* or brochure* or information or interview* or program* or discuss* or teach* or instruct*)).tw,kf.

49 (dose* adj3 (support* or educat* or tool* or intervention* or counsel* or pamphlet* or brochure* or information or interview* or program* or discuss* or teach* or instruct*)).tw,kf.

50 (dosing* adj3 (support* or educat* or tool* or intervention* or counsel* or pamphlet* or brochure* or information or interview* or program* or discuss* or teach* or instruct*)).tw,kf.

51 (drug* adj3 (support* or educat* or tool* or intervention* or counsel* or pamphlet* or brochure* or information or interview* or program* or discuss* or teach* or instruct*)).tw,kf.

52 39 or 40 or 41 or 42 or 43 or 44 or 45 or 46 or 47 or 48 or 49 or 50 or 51

53 20 and 52

## Database: Embase Classic+Embase <2004 to 2019 July 29>

## Search Strategy:

## --------------------------------------------------------------------------------

1 transitional care/

2 transition to adult care/

3 clinical handover/

4 aftercare/

5 hospital discharge/

6 patient transport/

7 (transition* adj3 care*).tw,kw.

8 (pre-transition* or post-transition*).tw,kw.

9 (transition* adj2 (patient* or team*)).tw,kw.

10 (patient* adj2 (discharg* or transfer*)).tw,kw.

11 (caregiver* adj2 (discharg* or transfer*)).tw,kw.

12 (after adj2 (discharg* or transfer*)).tw,kw.

13 (follow* adj2 (discharg* or transfer*)).tw,kw.

14 (discharg* adj2 plan*).tw,kw.

15 (hospital* adj5 discharg*).tw,kw.

16 (hospital* adj2 leav*).tw,kw.

17 inhospital*.tw,kw.

18 1 or 2 or 3 or 4 or 5 or 6 or 7 or 8 or 9 or 10 or 11 or 12 or 13 or 14 or 15 or 16 or 17

19 health education/

20 health literacy/

21 patient education/

22 comprehension/

23 teaching/

24 interpersonal communication/

25 attitude to health/

26 patient participation/

27 19 or 20 or 21 or 22 or 23 or 24 or 25 or 26

28 prescription/

29 drug therapy/

30 hospital department/

31 medication compliance/

32 drug information/

33 drug monitoring/ or prescription drug monitoring program/

34 medication therapy management/

35 28 or 29 or 30 or 31 or 32 or 33 or 34

36 27 and 35

37 (medication* adj2 (understand* or adher* or comprehen* or inform* or knowledg* or complian*)).tw,kw.

38 (prescri* adj2 (understand* or adher* or comprehen* or inform* or knowledg* or complian*)).tw,kw.

39 (pharmaceutic* adj2 (understand* or adher* or comprehen* or inform* or knowledg* or complian*)).tw,kw.

40 (dose* adj2 (understand* or adher* or comprehen* or inform* or knowledg* or complian*)).tw,kw.

41 (dosing* adj2 (understand* or adher* or comprehen* or inform* or knowledg* or complian*)).tw,kw.

42 (drug* adj2 (understand* or adher* or comprehen* or inform* or knowledg* or complian*)).tw,kw.

43 (medication* adj3 (support* or educat* or tool* or intervention* or counsel* or pamphlet* or brochure* or information* or interview* or program* or discuss* or teach* or instruct*)).tw,kw.

44 (prescri* adj3 (support* or educat* or tool* or intervention* or counsel* or pamphlet* or brochure* or information or interview* or program* or discuss* or teach* or instruct*)).tw,kw.

45 (pharmaceutic* adj3 (support* or educat* or tool* or intervention* or counsel* or pamphlet* or brochure* or information or interview* or program* or discuss* or teach* or instruct*)).tw,kw.

46 (dose* adj3 (support* or educat* or tool* or intervention* or counsel* or pamphlet* or brochure* or information or interview* or program* or discuss* or teach* or instruct*)).tw,kw.

47 (dosing* adj3 (support* or educat* or tool* or intervention* or counsel* or pamphlet* or brochure* or information or interview* or program* or discuss* or teach* or instruct*)).tw,kw.

48 (drug* adj3 (support* or educat* or tool* or intervention* or counsel* or pamphlet* or brochure* or information or interview* or program* or discuss* or teach* or instruct*)).tw,kw.

49 36 or 37 or 38 or 39 or 40 or 41 or 42 or 43 or 44 or 45 or 46 or 47 or 48

50 18 and 49

## Interface - EBSCOhost Research Databases Search Screen - Advanced Search Database - CINAHL Plus with Full Text <2004-July 30, 2019>

| **#** | **Query** |
| --- | --- |
| S47 | S20 AND S46 |
| S46 | S24 OR S25 OR S26 OR S27 OR S28 OR S29 OR S30 OR S31 OR S32 OR S33 OR S34 OR S35 OR S45 |
| S45 | S43 AND S44 |
| S44 | S21 OR S22 OR S23 |
| S43 | S37 OR S38 OR S39 OR S40 OR S41 OR S42 |
| S42 | (MH "Prescription Drug Monitoring Programs") |
| S41 | (MH "Drug Information Services") |
| S40 | (MH "Medication Compliance") |
| S39 | (MH "Pharmacy Service") OR (MH "Medication Management") |
| S38 | (MH "Drug Therapy") |
| S37 | (MH "Prescriptions, Drug") |
| S36 | S21 OR S22 OR S23 OR S24 OR S25 OR S26 OR S27 OR S28 OR S29 OR S30 OR S31 OR S32 OR S33 OR S34 OR S35 |
| S35 | TI ( (drug* N3 (support* or educat* or tool* or intervention* or counsel* or pamphlet* or brochure* or information or interview* or program* or discuss* or teach* or instruct*)) ) OR AB ( (drug* N3 (support* or educat* or tool* or intervention* or counsel* or pamphlet* or brochure* or information or interview* or program* or discuss* or teach* or instruct*)) ) |
| S34 | TI ( (dosing* N3 (support* or educat* or tool* or intervention* or counsel* or pamphlet* or brochure* or information or interview* or program* or discuss* or teach* or instruct*)) ) OR AB ( (dosing* N3 (support* or educat* or tool* or intervention* or counsel* or pamphlet* or brochure* or information or interview* or program* or discuss* or teach* or instruct*)) ) |
| S33 | TI ( (dose* N3 (support* or educat* or tool* or intervention* or counsel* or pamphlet* or brochure* or information or interview* or program* or discuss* or teach* or instruct*)) ) OR AB ( (dose* N3 (support* or educat* or tool* or intervention* or counsel* or pamphlet* or brochure* or information or interview* or program* or discuss* or teach* or instruct*)) ) |
| S32 | TI ( (pharmaceutic* N3 (support* or educat* or tool* or intervention* or counsel* or pamphlet* or brochure* or information or interview* or program* or discuss* or teach* or instruct*)) ) OR AB ( (pharmaceutic* N3 (support* or educat* or tool* or intervention* or counsel* or pamphlet* or brochure* or information or interview* or program* or discuss* or teach* or instruct*)) ) |
| S31 | TI ( (prescri* N3 (support* or educat* or tool* or intervention* or counsel* or pamphlet* or brochure* or information or interview* or program* or discuss* or teach* or instruct*)) ) OR AB ( (prescri* N3 (support* or educat* or tool* or intervention* or counsel* or pamphlet* or brochure* or information or interview* or program* or discuss* or teach* or instruct*)) ) |
| S30 | TI ( (medication* N3 (support* or educat* or tool* or intervention* or counsel* or pamphlet* or brochure* or information* or interview* or program* or discuss* or teach* or instruct*)) ) OR AB ( (medication* N3 (support* or educat* or tool* or intervention* or counsel* or pamphlet* or brochure* or information* or interview* or program* or discuss* or teach* or instruct*)) ) |
| S29 | TI ( (drug* N2 (understand* or adher* or comprehen* or inform* or knowledg* or complian*)) ) OR AB ( (drug* N2 (understand* or adher* or comprehen* or inform* or knowledg* or complian*)) ) |
| S28 | TI ( (dosing* N2 (understand* or adher* or comprehen* or inform* or knowledg* or complian*)) ) OR AB ( (dosing* N2 (understand* or adher* or comprehen* or inform* or knowledg* or complian*)) ) |
| S27 | TI ( (dose* N2 (understand* or adher* or comprehen* or inform* or knowledg* or complian*)). ) OR AB ( (dose* N2 (understand* or adher* or comprehen* or inform* or knowledg* or complian*)). ) |
| S26 | TI ( (pharmaceutic* N2 (understand* or adher* or comprehen* or inform* or knowledg* or complian*)) ) OR AB ( (pharmaceutic* N2 (understand* or adher* or comprehen* or inform* or knowledg* or complian*)) ) |
| S25 | TI ( (prescri* N2 (understand* or adher* or comprehen* or inform* or knowledg* or complian*)). ) OR AB ( (prescri* N2 (understand* or adher* or comprehen* or inform* or knowledg* or complian*)) |
| S24 | TI ( (medication* N2 (understand* or adher* or comprehen* or inform* or knowledg* or complian*)) ) OR AB ( (medication* N2 (understand* or adher* or comprehen* or inform* or knowledg* or complian*)) ) |
| S23 | (MH "Health Literacy") |
| S22 | (MH "Patient Education") |
| S21 | (MH "Health Education") |
| S20 | S1 OR S2 OR S3 OR S4 OR S5 OR S6 OR S7 OR S8 OR S9 OR S10 OR S11 OR S12 OR S13 OR S14 OR S15 OR S16 OR S17 OR S18 OR S19 |
| S19 | TI inhospital* OR AB inhospital* |
| S18 | TI (hospital* N2 leav*) OR AB (hospital* N2 leav*) |
| S17 | TI (hospital* N5 discharg*) OR AB (hospital* N5 discharg*) |
| S16 | TI (discharg* N2 plan*) OR AB (discharg* N2 plan*) |
| S15 | TI ( (follow* N2 (discharg* or transfer*)) ) OR AB ( (follow* N2 (discharg* or transfer*)) ) |
| S14 | TI ( (after N2 (discharg* or transfer*)) ) OR AB ( (after N2 (discharg* or transfer*)) ) |
| S13 | TI ( (caregiver* N2 (discharg* or transfer*)) ) OR AB ( (caregiver* N2 (discharg* or transfer*)) ) |
| S12 | TI ( patient* N2 (discharg* or transfer*)) ) OR AB ( patient* N2 (discharg* or transfer*)) ) |
| S11 | TI ( (transition* N2 (patient* or team*)) ) OR AB ( (transition* N2 (patient* or team*)) ) |
| S10 | TI ( (pre-transition* or post-transition*) ) OR AB ( (pre-transition* or post-transition*) ) |
| S9 | TI (transition* N3 care*) OR AB (transition* N3 care*) |
| S8 | (MH "Hand Off (Patient Safety)") |
| S7 | (MH "Early Patient Discharge") |
| S6 | (MH "Transfer, Discharge") |
| S5 | (MH "After Care") |
| S4 | (MH "Patient Discharge Education") |
| S3 | (MH "Discharge Planning") |
| S2 | (MH "Continuity of Patient Care") |
| S1 | (MH "Transitional Care") |

## Cochrane Library <2004-July 30, 2019>

ID Search Hits

#1 MeSH descriptor: [Transitional Care] this term only

#2 MeSH descriptor: [Continuity of Patient Care] this term only

#3 MeSH descriptor: [Aftercare] this term only

#4 MeSH descriptor: [Patient Discharge] explode all trees

#5 MeSH descriptor: [Patient Transfer] this term only

#6 MeSH descriptor: [Patient Handoff] explode all trees

#7 MeSH descriptor: [Transition to Adult Care] this term only

#8 MeSH descriptor: [Retention in Care] this term only

#9 transition* NEAR/3 care*:ti,ab,kw

#10 (pre-transition* or post-transition*):ti,ab,kw

#11 (transition* NEAR/2 (patient* or team*)):ti,ab,kw

#12 (patient* NEAR/2 (discharg* or transfer*)):ti,ab,kw

#13 (caregiver* NEAR/2 (discharg* or transfer)):ti,ab,kw

#14 (after NEAR/2 (discharg* or transfer*)):ti,ab,kw

#15 (follow* NEAR/2 (discharg* or transfer*)):ti,ab,kw

#16 (discharg* NEAR/2 plan*):ti,ab,kw

#17 (hospital* NEAR/5 discharg*):ti,ab,kw

#18 (hospital* NEAR/2 leav*):ti,ab,kw

#19 inhospital*:ti,ab,kw

#20 #1 OR #2 OR #3 OR #4 OR #5 OR #6 OR #7 OR #8 OR #9 OR #10 OR #11 OR #12 OR #13 OR #14 OR #15 OR #16 OR #17 OR #18 OR #19

#21 MeSH descriptor: [Health Education] this term only

#22 MeSH descriptor: [Health Literacy] this term only

#23 MeSH descriptor: [Patient Education as Topic] this term only

#24 MeSH descriptor: [Comprehension] this term only

#25 MeSH descriptor: [Teaching] this term only

#26 MeSH descriptor: [Communication] this term only

#27 MeSH descriptor: [Health Knowledge, Attitudes, Practice] this term only

#28 MeSH descriptor: [Patient Participation] this term only

#29 #21 OR #22 OR #23 OR #24 OR #25 OR #26 OR #27 OR #28

#30 MeSH descriptor: [Pharmaceutical Preparations] this term only

#31 MeSH descriptor: [Drug Prescriptions] this term only

#32 MeSH descriptor: [Drug Therapy] this term only

#33 MeSH descriptor: [Pharmacy Service, Hospital] this term only

#34 MeSH descriptor: [Medication Adherence] this term only

#35 MeSH descriptor: [Drug Information Services] this term only

#36 MeSH descriptor: [Medication Therapy Management] this term only

#37 #30 OR #31 OR #32 OR #33 OR #34 OR #35 OR #36

#38 #29 AND #37

#39 (medication* near/2 (understand* or adher* or comprehen* or inform* or knowledg* or complian*)):TI,AB,KW

#40 (prescri* NEAR/2 (understand* or adher* or comprehen* or inform* or knowledg* or complian*)):TI,AB,KW

#41 (pharmaceutic* NEAR/2 (understand* or adher* or comprehen* or inform* or knowledg* or complian*)):TI,AB,KW

#42 (dose* NEAR/2 (understand* or adher* or comprehen* or inform* or knowledg* or complian*)):TI,AB,KW

#43 (dosing* NEAR/2 (understand* or adher* or comprehen* or inform* or knowledg* or complian*)):TI,AB,KW

#44 (drug* NEAR/2 (understand* or adher* or comprehen* or inform* or knowledg* or complian*)):TI,AB,KW

#45 (medication* NEAR/3 (support* or educat* or tool* or intervention* or counsel* or pamphlet* or brochure* or information* or interview* or program* or discuss* or teach* or instruct*)):TI,AB,KW

#46 prescri* NEAR/3 (support* or educat* or tool* or intervention* or counsel* or pamphlet* or brochure* or information or interview* or program* or discuss* or teach* or instruct*):TI,AB,KW

#47 (pharmaceutic* NEAR/3 (support* or educat* or tool* or intervention* or counsel* or pamphlet* or brochure* or information or interview* or program* or discuss* or teach* or instruct*)):TI,AB,KW

#48 dose* NEAR/3 (support* or educat* or tool* or intervention* or counsel* or pamphlet* or brochure* or information or interview* or program* or discuss* or teach* or instruct*):TI,AB,KW

#49 (dosing* NEAR/3 (support* or educat* or tool* or intervention* or counsel* or pamphlet* or brochure* or information or interview* or program* or discuss* or teach* or instruct*)):TI,AB,KW

#50 (drug* NEAR/3 (support* or educat* or tool* or intervention* or counsel* or pamphlet* or brochure* or information or interview* or program* or discuss* or teach* or instruct*)):TI,AB,KW

#51 #38 OR #39 OR #40 OR #41 OR #42 OR #43 OR #44 OR #45 OR #46 OR #47 OR #48 OR #49 OR #50

#52 #20 and #51
